# Supplementary material for: A Novel Sorbitol-Based Flow Cytometry Buffer Is Effective for Genome Size Estimation across a Cypriot Grapevine Collection
Source: MDPI journal article supplement (doi:10.3390/plants13050733), 2024-03-05
Supplement: s1 [file s1]

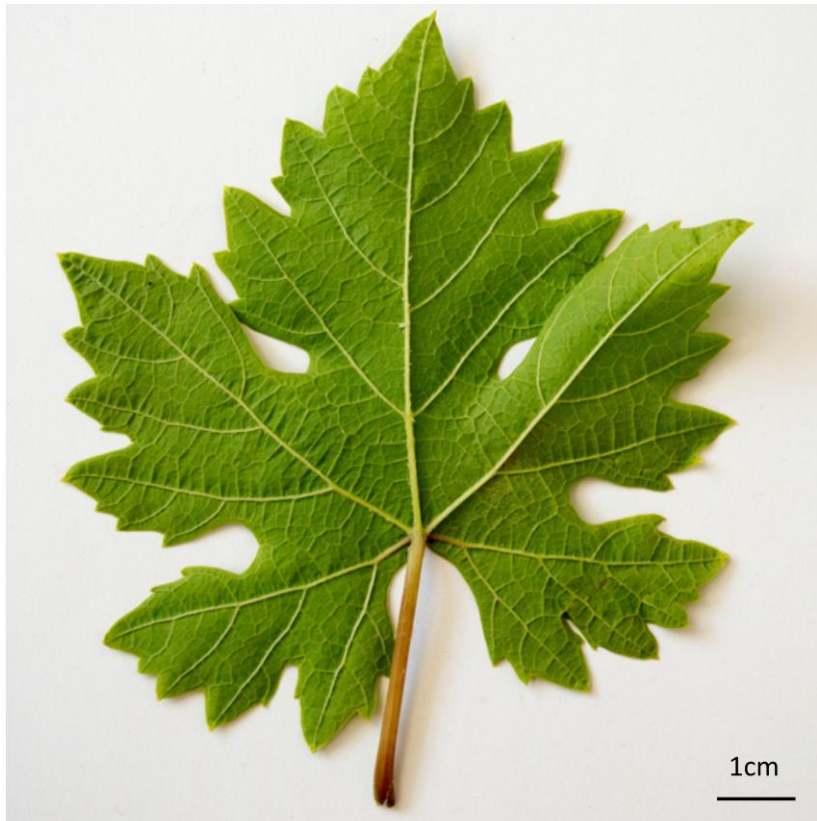

**Figure S1.** An example of a fully matured leaf of cv. 'Xynisteri'. Accumulation of pigments due to UV exposure is evident.

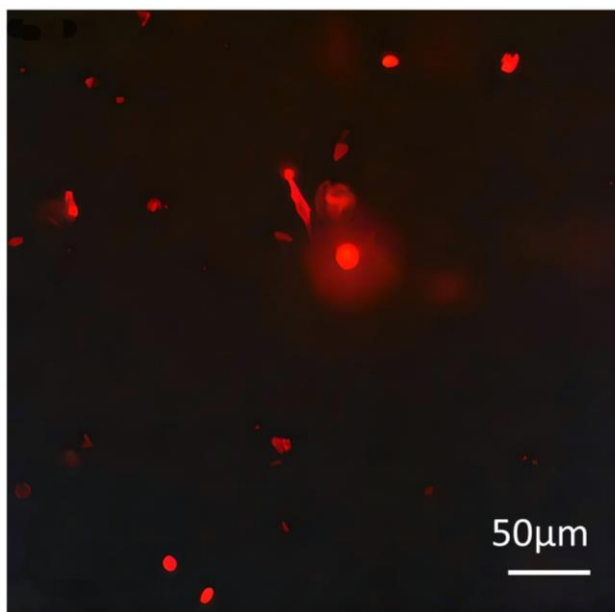

**Figure S2.** Fluorescence image of nuclei suspensions prepared with Sorbitol-based buffer. Nuclei were generally solitary without evident clumping.
